# Supplementary material
Source: PubMed Central journal article supplement (PMC7444610)
Supplement: mmc2.pdf [file mmc2.pdf]

**Supplementary table 1: COVID-19 Patients characteristics by availability of discharge information**

|                                        |                      | No./total No. (%)                    |                                         |                     |
|----------------------------------------|----------------------|--------------------------------------|-----------------------------------------|---------------------|
|                                        |                      | With discharge information<br>n=8075 | Without discharge information<br>n=2332 | <i>p</i> value      |
| <b>Demographic characteristics</b>     |                      |                                      |                                         |                     |
| <i>Age, years</i>                      |                      |                                      |                                         |                     |
|                                        | 16-30                | 134/8071 (1.7)                       | 53/2311 (2.3)                           |                     |
|                                        | 31-44                | 547/8071 (6.8)                       | 118/2311 (5.1)                          |                     |
|                                        | 45-64                | 2351/8071 (29.1)                     | 619/2311 (26.8)                         |                     |
|                                        | 65-79                | 2410/8071 (29.9)                     | 772/2311 (33.4)                         | 0.0715 <sup>‡</sup> |
|                                        | >80                  | 2629/8071 (32.6)                     | 749/2311 (32.4)                         |                     |
|                                        | <i>Median (IQR)</i>  | 72 (69-83)                           | 72 (60-82)                              |                     |
| <i>Male sex</i>                        |                      | 4317/7986 (54.1)                     | 1276/2331 (54.7)                        | 0.5602 <sup>‡</sup> |
| <b>Pre-existing conditions</b>         |                      |                                      |                                         |                     |
| <i>Cardiovascular disease</i>          |                      | 2836 (35.1)                          | 803 (34.4)                              | 0.5401 <sup>‡</sup> |
| <i>Arterial hypertension</i>           |                      | 3270 (40.5)                          | 969 (41.6)                              | 0.3602 <sup>‡</sup> |
| <i>Diabetes</i>                        |                      | 1794 (22.2)                          | 544 (23.3)                              | 0.2575 <sup>‡</sup> |
| <i>Chronic renal disease</i>           |                      | 1093 (13.5)                          | 283 (12.1)                              | 0.0787 <sup>‡</sup> |
| <i>Chronic liver disease</i>           |                      | 221 (2.7)                            | 59 (2.5)                                | 0.5866 <sup>‡</sup> |
| <i>Chronic lung disease</i>            |                      | 1215 (15.0)                          | 337 (14.5)                              | 0.4771 <sup>‡</sup> |
| <i>Neurological disorders</i>          |                      | 780 (9.7)                            | 203 (8.7)                               | 0.1651 <sup>‡</sup> |
| <i>Cognitive disorders<sup>1</sup></i> |                      | 913/7526 (12.1)                      | 243/2150 (11.3)                         | 0.2960 <sup>‡</sup> |
| <i>Immunosuppressive conditions</i>    |                      | 237 (2.9)                            | 58 (2.5)                                | 0.2510 <sup>‡</sup> |
| <i>Malignancy</i>                      |                      |                                      |                                         |                     |
|                                        | <i>Solid</i>         | 659 (8.2)                            | 206 (8.8)                               | 0.3000 <sup>‡</sup> |
|                                        | <i>Hematological</i> | 160 (2.0)                            | 44 (1.9)                                | 0.7715 <sup>‡</sup> |
| <i>Obesity<sup>1</sup></i>             |                      | 483/4927 (9.8)                       | 136/1334 (10.2)                         | 0.6706 <sup>‡</sup> |
| <i>Current smoker</i>                  |                      | 379/4306 (8.8)                       | 152/1258 (12.1)                         | 0.0005 <sup>‡</sup> |

among patients with admission data

All the pre-existing conditions and COVID-19 features were reported as assessed by the clinician

<sup>1</sup>Missingness is due to later onset of data collection

\* Wilcoxon test

<sup>‡</sup>Chi-Square test
